# Supplementary material for: Meat Consumption and Gut Microbiota: a Scoping Review of Literature and Systematic Review of Randomized Controlled Trials in Adults
Source: PubMed Central journal article supplement — Adv Nutr. 2022 Dec 19;14(2):215–37. doi: 10.1016/j.advnut.2022.10.005 (PMC10229385; doi:10.1016/j.advnut.2022.10.005), 2022-12-19
Supplement: mmc1.pdf [file mmc1.pdf]

| <b>PubMed (Legacy version)</b>                                                                                                                                                                                                                                                                                                                                                                                                                                                                                                                                                                                                                                                                                                                                                                                                                                                                                                                                                                                                                                                                                                                                                                                                                                                                                                                                                                                                                                                                                                                                                                                                                                                                                                                                                                                                                |                                                       |
|-----------------------------------------------------------------------------------------------------------------------------------------------------------------------------------------------------------------------------------------------------------------------------------------------------------------------------------------------------------------------------------------------------------------------------------------------------------------------------------------------------------------------------------------------------------------------------------------------------------------------------------------------------------------------------------------------------------------------------------------------------------------------------------------------------------------------------------------------------------------------------------------------------------------------------------------------------------------------------------------------------------------------------------------------------------------------------------------------------------------------------------------------------------------------------------------------------------------------------------------------------------------------------------------------------------------------------------------------------------------------------------------------------------------------------------------------------------------------------------------------------------------------------------------------------------------------------------------------------------------------------------------------------------------------------------------------------------------------------------------------------------------------------------------------------------------------------------------------|-------------------------------------------------------|
| <p>((((meat[mesh] OR meat[Title/Abstract] OR poultry[Title/Abstract] OR chicken[Title/Abstract] OR beef[Title/Abstract] OR pork[Title/Abstract] OR fish[Title/Abstract] OR seafood[Title/Abstract] OR shellfish[Title/Abstract]) OR (DASH[Title/Abstract] OR "Ketogenic diet"[Title/Abstract] OR "Mediterranean diet"[Title/Abstract] OR "Paleolithic diet"[Title/Abstract] OR "paleo diet"[Title/Abstract] OR "vegetarian diet"[Title/Abstract] OR "vegan diet"[Title/Abstract] OR "western diet"[Title/Abstract] OR "Feeding Behavior"[Mesh] OR "Diet"[Mesh])) AND ("Gastrointestinal Microbiome"[Mesh] OR "Microbiota"[Mesh] OR ((gut[Title/Abstract] OR colonic[Title/Abstract] OR intestinal[Title/Abstract] OR gastrointestinal[Title/Abstract] OR enteric[Title/Abstract]) AND (microbiota[Title/Abstract] OR microflora[Title/Abstract] OR flora[Title/Abstract] OR microbiome[Title/Abstract] OR bacteria[Title/Abstract] OR bacterium[Title/Abstract])) OR ((gut microbiota-derived[Title/Abstract] OR gut-derived[Title/Abstract] OR microbial[Title/Abstract]) AND metabolites[Title/Abstract]) OR "uremic toxins"[Title/Abstract] OR GDUT[Title/Abstract] OR "trimethylammonium oxide"[Title/Abstract] OR "trimethylamine N-oxide"[Title/Abstract] OR TMAO[Title/Abstract] OR "trimethylamine oxide"[Title/Abstract] OR "p-cresol sulfate"[Title/Abstract] OR "p-cresyl glucuronide"[Title/Abstract] OR phenylacetylglutamine[Title/Abstract] OR "short chain fatty acid"[Title/Abstract] OR "short chain fatty acids"[Title/Abstract] OR SCFA[Title/Abstract] OR SCFAs[Title/Abstract] OR "Fatty Acids, Volatile"[Mesh] OR "phytoestrogens"[Mesh] OR "anthocyanins"[Mesh] OR "Bile Acids and Salts"[Mesh] OR "lipopolysaccharides"[Mesh])) NOT (Animals[mesh] NOT (Animals[mesh] AND Humans[mesh])) ) AND (english[Filter])</p> |                                                       |
| <b>Cochrane</b>                                                                                                                                                                                                                                                                                                                                                                                                                                                                                                                                                                                                                                                                                                                                                                                                                                                                                                                                                                                                                                                                                                                                                                                                                                                                                                                                                                                                                                                                                                                                                                                                                                                                                                                                                                                                                               |                                                       |
| ID                                                                                                                                                                                                                                                                                                                                                                                                                                                                                                                                                                                                                                                                                                                                                                                                                                                                                                                                                                                                                                                                                                                                                                                                                                                                                                                                                                                                                                                                                                                                                                                                                                                                                                                                                                                                                                            | Search                                                |
| #1                                                                                                                                                                                                                                                                                                                                                                                                                                                                                                                                                                                                                                                                                                                                                                                                                                                                                                                                                                                                                                                                                                                                                                                                                                                                                                                                                                                                                                                                                                                                                                                                                                                                                                                                                                                                                                            | MeSH descriptor: [Meat] explode all trees             |
| #2                                                                                                                                                                                                                                                                                                                                                                                                                                                                                                                                                                                                                                                                                                                                                                                                                                                                                                                                                                                                                                                                                                                                                                                                                                                                                                                                                                                                                                                                                                                                                                                                                                                                                                                                                                                                                                            | (meat):ti,ab,kw                                       |
| #3                                                                                                                                                                                                                                                                                                                                                                                                                                                                                                                                                                                                                                                                                                                                                                                                                                                                                                                                                                                                                                                                                                                                                                                                                                                                                                                                                                                                                                                                                                                                                                                                                                                                                                                                                                                                                                            | MeSH descriptor: [Poultry] explode all trees          |
| #4                                                                                                                                                                                                                                                                                                                                                                                                                                                                                                                                                                                                                                                                                                                                                                                                                                                                                                                                                                                                                                                                                                                                                                                                                                                                                                                                                                                                                                                                                                                                                                                                                                                                                                                                                                                                                                            | (poultry):ti,ab,kw                                    |
| #5                                                                                                                                                                                                                                                                                                                                                                                                                                                                                                                                                                                                                                                                                                                                                                                                                                                                                                                                                                                                                                                                                                                                                                                                                                                                                                                                                                                                                                                                                                                                                                                                                                                                                                                                                                                                                                            | MeSH descriptor: [Chickens] explode all trees         |
| #6                                                                                                                                                                                                                                                                                                                                                                                                                                                                                                                                                                                                                                                                                                                                                                                                                                                                                                                                                                                                                                                                                                                                                                                                                                                                                                                                                                                                                                                                                                                                                                                                                                                                                                                                                                                                                                            | (chicken):ti,ab,kw                                    |
| #7                                                                                                                                                                                                                                                                                                                                                                                                                                                                                                                                                                                                                                                                                                                                                                                                                                                                                                                                                                                                                                                                                                                                                                                                                                                                                                                                                                                                                                                                                                                                                                                                                                                                                                                                                                                                                                            | MeSH descriptor: [Red Meat] explode all trees         |
| #8                                                                                                                                                                                                                                                                                                                                                                                                                                                                                                                                                                                                                                                                                                                                                                                                                                                                                                                                                                                                                                                                                                                                                                                                                                                                                                                                                                                                                                                                                                                                                                                                                                                                                                                                                                                                                                            | (beef):ti,ab,kw                                       |
| #9                                                                                                                                                                                                                                                                                                                                                                                                                                                                                                                                                                                                                                                                                                                                                                                                                                                                                                                                                                                                                                                                                                                                                                                                                                                                                                                                                                                                                                                                                                                                                                                                                                                                                                                                                                                                                                            | MeSH descriptor: [Red Meat] explode all trees         |
| #10                                                                                                                                                                                                                                                                                                                                                                                                                                                                                                                                                                                                                                                                                                                                                                                                                                                                                                                                                                                                                                                                                                                                                                                                                                                                                                                                                                                                                                                                                                                                                                                                                                                                                                                                                                                                                                           | (pork):ti,ab,kw                                       |
| #11                                                                                                                                                                                                                                                                                                                                                                                                                                                                                                                                                                                                                                                                                                                                                                                                                                                                                                                                                                                                                                                                                                                                                                                                                                                                                                                                                                                                                                                                                                                                                                                                                                                                                                                                                                                                                                           | MeSH descriptor: [Fishes] explode all trees           |
| #12                                                                                                                                                                                                                                                                                                                                                                                                                                                                                                                                                                                                                                                                                                                                                                                                                                                                                                                                                                                                                                                                                                                                                                                                                                                                                                                                                                                                                                                                                                                                                                                                                                                                                                                                                                                                                                           | (fish):ti,ab,kw                                       |
| #13                                                                                                                                                                                                                                                                                                                                                                                                                                                                                                                                                                                                                                                                                                                                                                                                                                                                                                                                                                                                                                                                                                                                                                                                                                                                                                                                                                                                                                                                                                                                                                                                                                                                                                                                                                                                                                           | MeSH descriptor: [Seafood] explode all trees          |
| #14                                                                                                                                                                                                                                                                                                                                                                                                                                                                                                                                                                                                                                                                                                                                                                                                                                                                                                                                                                                                                                                                                                                                                                                                                                                                                                                                                                                                                                                                                                                                                                                                                                                                                                                                                                                                                                           | (seafood):ti,ab,kw                                    |
| #15                                                                                                                                                                                                                                                                                                                                                                                                                                                                                                                                                                                                                                                                                                                                                                                                                                                                                                                                                                                                                                                                                                                                                                                                                                                                                                                                                                                                                                                                                                                                                                                                                                                                                                                                                                                                                                           | MeSH descriptor: [Shellfish] explode all trees        |
| #16                                                                                                                                                                                                                                                                                                                                                                                                                                                                                                                                                                                                                                                                                                                                                                                                                                                                                                                                                                                                                                                                                                                                                                                                                                                                                                                                                                                                                                                                                                                                                                                                                                                                                                                                                                                                                                           | (shellfish):ti,ab,kw                                  |
| #17                                                                                                                                                                                                                                                                                                                                                                                                                                                                                                                                                                                                                                                                                                                                                                                                                                                                                                                                                                                                                                                                                                                                                                                                                                                                                                                                                                                                                                                                                                                                                                                                                                                                                                                                                                                                                                           | (DASH):ti,ab,kw                                       |
| #18                                                                                                                                                                                                                                                                                                                                                                                                                                                                                                                                                                                                                                                                                                                                                                                                                                                                                                                                                                                                                                                                                                                                                                                                                                                                                                                                                                                                                                                                                                                                                                                                                                                                                                                                                                                                                                           | ("ketogenic diet"):ti,ab,kw                           |
| #19                                                                                                                                                                                                                                                                                                                                                                                                                                                                                                                                                                                                                                                                                                                                                                                                                                                                                                                                                                                                                                                                                                                                                                                                                                                                                                                                                                                                                                                                                                                                                                                                                                                                                                                                                                                                                                           | (Mediterranean diet):ti,ab,kw                         |
| #20                                                                                                                                                                                                                                                                                                                                                                                                                                                                                                                                                                                                                                                                                                                                                                                                                                                                                                                                                                                                                                                                                                                                                                                                                                                                                                                                                                                                                                                                                                                                                                                                                                                                                                                                                                                                                                           | (Paleolithic diet):ti,ab,kw                           |
| #21                                                                                                                                                                                                                                                                                                                                                                                                                                                                                                                                                                                                                                                                                                                                                                                                                                                                                                                                                                                                                                                                                                                                                                                                                                                                                                                                                                                                                                                                                                                                                                                                                                                                                                                                                                                                                                           | (paleo diet):ti,ab,kw                                 |
| #22                                                                                                                                                                                                                                                                                                                                                                                                                                                                                                                                                                                                                                                                                                                                                                                                                                                                                                                                                                                                                                                                                                                                                                                                                                                                                                                                                                                                                                                                                                                                                                                                                                                                                                                                                                                                                                           | (vegetarian diet):ti,ab,kw                            |
| #23                                                                                                                                                                                                                                                                                                                                                                                                                                                                                                                                                                                                                                                                                                                                                                                                                                                                                                                                                                                                                                                                                                                                                                                                                                                                                                                                                                                                                                                                                                                                                                                                                                                                                                                                                                                                                                           | (vegan diet):ti,ab,kw                                 |
| #24                                                                                                                                                                                                                                                                                                                                                                                                                                                                                                                                                                                                                                                                                                                                                                                                                                                                                                                                                                                                                                                                                                                                                                                                                                                                                                                                                                                                                                                                                                                                                                                                                                                                                                                                                                                                                                           | ("Western diet"):ti,ab,kw                             |
| #25                                                                                                                                                                                                                                                                                                                                                                                                                                                                                                                                                                                                                                                                                                                                                                                                                                                                                                                                                                                                                                                                                                                                                                                                                                                                                                                                                                                                                                                                                                                                                                                                                                                                                                                                                                                                                                           | MeSH descriptor: [Feeding Behavior] explode all trees |
| #26                                                                                                                                                                                                                                                                                                                                                                                                                                                                                                                                                                                                                                                                                                                                                                                                                                                                                                                                                                                                                                                                                                                                                                                                                                                                                                                                                                                                                                                                                                                                                                                                                                                                                                                                                                                                                                           | MeSH descriptor: [Diet] explode all trees             |

#27 #1 OR #2 OR #3 OR #4 OR #5 OR #6 OR #7 OR #8 OR #9 OR #10 OR #11 OR #12 OR #13 OR #14 OR #15 OR #16 OR #17 OR #18 OR #19 OR #20 OR #21 OR #22 OR #23 OR #24 OR #25 OR #26

#28 MeSH descriptor: [Gastrointestinal Microbiome] explode all trees

#29 MeSH descriptor: [Microbiota] explode all trees

#30 (gut):ti,ab,kw

#31 (colonic):ti,ab,kw

#32 (intestinal):ti,ab,kw

#33 (gastrointestinal):ti,ab,kw

#34 (enteric):ti,ab,kw

#35 #30 OR #31 OR #32 OR #33 OR #34

#36 (microbiota):ti,ab,kw

#37 ("microflora"):ti,ab,kw

#38 (flora):ti,ab,kw

#39 (microbiome):ti,ab,kw

#40 (bacteria):ti,ab,kw

#41 ("Bacterium"):ti,ab,kw

#42 #36 OR #37 OR #38 OR #39 OR #40 OR #41

#43 #35 AND #42

#44 (gut microbiota-derived):ti,ab,kw

#45 (gut-derived):ti,ab,kw

#46 (microbial):ti,ab,kw

#47 #44 OR #45 OR #46

#48 (metabolites):ti,ab,kw

#49 #47 AND #48

#50 (uremic toxins):ti,ab,kw

#51 (GDUT):ti,ab,kw

#52 (trimethylammonium oxide):ti,ab,kw

#53 (trimethylamine N-oxide):ti,ab,kw

#54 (TMAO):ti,ab,kw

#55 (trimethylamine oxide):ti,ab,kw

#56 (p-cresyl sulfate):ti,ab,kw

#57 (p-cresyl glucuronide):ti,ab,kw

#58 (phenylacetylglutamine):ti,ab,kw

#59 ("short chain fatty acid"):ti,ab,kw

#60 ("short chain fatty acids"):ti,ab,kw

#61 (SCFA):ti,ab,kw

#62 (SCFAs):ti,ab,kw

#63 MeSH descriptor: [Fatty Acids, Volatile] explode all trees

#64 MeSH descriptor: [Phytoestrogens] explode all trees

#65 MeSH descriptor: [Anthocyanins] explode all trees

#66 MeSH descriptor: [Bile Acids and Salts] explode all trees

#67 MeSH descriptor: [Lipopolysaccharides] explode all trees

#68 #28 OR #29 OR #43 OR #49 OR #50 OR #51 OR #52 OR #53 OR #54 OR #55 OR #56 OR #57 OR #58 OR #59 OR #60 OR #61 OR #62 OR #63 OR #64 OR #65 OR #66 OR #67

#69 #27 AND #68

### Scopus

( TITLE-ABS-KEY ( meat\* OR poultry OR chicken\* OR beef OR pork OR fish\* OR seafood\* OR shellfish\* OR dash OR "Ketogenic diet" OR "Mediterranean diet" OR "Paleolithic diet" OR "paleo diet" OR "vegetarian diet" OR "vegan diet" OR "western diet" OR "Feeding Behavior\*" OR diet\* ) ) AND ( TITLE-ABS-KEY ( "Gastrointestinal Microbiome" OR "Microbiota" OR ( ( gut OR colonic OR intestinal OR gastrointestinal OR enteric ) AND ( microbiota OR microflora OR flora

OR microbiome OR bacteria OR bacterium)) OR (( gut AND microbiota-derived OR gut-derived OR microbial ) AND metabolites ) OR "uremic toxin\*" OR gdut OR "trimethylammonium oxide\*" OR "trimethylamine N-oxide\*" OR tmao OR "trimethylamine oxide\*" OR "p-cresol sulfate\*" OR "p-cresyl glucuronide" OR phenylacetylglutamine\* OR "short chain fatty acid\*" OR scfa\* OR "phytoestrogen\*" OR "anthocyanin\*" OR "bile acid\*" OR "bile salt\*" OR "bile\*" OR "lipopolysaccharide\*" )) AND ( LIMIT-TO ( EXACTKEYWORD , "Article" ) OR LIMIT-TO ( EXACTKEYWORD , "Human" ) OR LIMIT-TO ( EXACTKEYWORD , "Humans" ) OR LIMIT-TO ( EXACTKEYWORD , "Diet" ) OR LIMIT-TO ( EXACTKEYWORD , "Microbiology" ) OR LIMIT-TO ( EXACTKEYWORD , "Microbiota" ) OR LIMIT-TO ( EXACTKEYWORD , "Bacteria" ) OR LIMIT-TO ( EXACTKEYWORD , "Bacterium" ) OR LIMIT-TO ( EXACTKEYWORD , "Intestine" ) OR LIMIT-TO ( EXACTKEYWORD , "Dietary Intake" ) OR LIMIT-TO ( EXACTKEYWORD , "Microflora" ) OR LIMIT-TO ( EXACTKEYWORD , "Chicken" ) OR LIMIT-TO ( EXACTKEYWORD , "Gastrointestinal Tract" ) OR LIMIT-TO ( EXACTKEYWORD , "Intestines" ) OR LIMIT-TO ( EXACTKEYWORD , "Gut Microbiota" ) OR LIMIT-TO ( EXACTKEYWORD , "Microbial Community" ) OR LIMIT-TO ( EXACTKEYWORD , "Chickens" ) OR LIMIT-TO ( EXACTKEYWORD , "Food Intake" ) OR LIMIT-TO ( EXACTKEYWORD , "Short Chain Fatty Acid" ) OR LIMIT-TO ( EXACTKEYWORD , "Microbiome" ) OR LIMIT-TO ( EXACTKEYWORD , "Fish" ) OR LIMIT-TO ( EXACTKEYWORD , "Nutrition" ) OR LIMIT-TO ( EXACTKEYWORD , "Major Clinical Study" ) OR LIMIT-TO ( EXACTKEYWORD , "Feces Analysis" ) OR LIMIT-TO ( EXACTKEYWORD , "Clinical Trial" ) OR LIMIT-TO ( EXACTKEYWORD , "Randomized Controlled Trial" ) OR LIMIT-TO ( EXACTKEYWORD , "Colon" ) OR LIMIT-TO ( EXACTKEYWORD , "Cecum" ) OR LIMIT-TO ( EXACTKEYWORD , "Bacterial Strain" ) OR LIMIT-TO ( EXACTKEYWORD , "Feeding Behavior" )) AND ( LIMIT-TO ( LANGUAGE , "English" )) AND ( LIMIT-TO ( SUBJAREA , "IMMU" ) OR LIMIT-TO ( SUBJAREA , "MULT" ) OR LIMIT-TO ( SUBJAREA , "HEAL" )) AND ( LIMIT-TO ( DOCTYPE , "ar" )) AND ( LIMIT-TO ( SRCTYPE , "j" ))

### **CINAHL Library**

Limiters - Published; Expanders - Apply equivalent subjects; Search modes - Boolean/Phrase;

Interface – EBSCOhost; Research Databases Search Screen - Basic Search; Database - CINAHL

S1 (MH "Meat+") OR (MH "Seafood+") OR (MH "Eggs") OR (MH "Dairy Products+") OR (MH "Cholesterol, Dietary") OR (MH "Butter")

S2 "red meat"

S3 "pork"

S4 "beef"

S5 (MH "Diet+")

S6 (MH "Eating Behavior+")

S7 S1 OR S2 OR S3 OR S4 OR S5 OR S6

S8 (MH "Gut Microbiota")

S9 "Microbiota" OR "Microbiome"

S10 "gastrointestinal" OR "enteric" OR "intestinal" OR "colonic" OR "gut"

S11 (MH "Microbiota+") OR "microbiota" OR "microflora" OR "flora" OR "microbiome" OR (MH "Bacteria+") OR "bacterium"

S12 S10 AND S11

S13 "gut microbiota-derived" OR "gut-derived" OR "microbial"

S14 "metabolites"

S15 S13 AND S14

S16 "uremic toxins" OR "GDUT" OR "trimethylammonium oxide" OR "trimethylamine N-oxide" OR "TMAO" OR "trimethylamine oxide" OR "p-cresyl sulfate" OR "p cresyl glucuronide" OR "phenylacetylglutamine" OR (MH "Phytoestrogens+") OR "anthocyanins" OR (MH "Lipopolysaccharides")

S17 (MH "Fatty Acids, Volatile+")

S18 (MH "Bile Acids and Salts")

S19 S8 OR S9 OR S12 OR S15 OR S16 OR S17 OR S18

S20 S7 AND S19
